# Supplementary material
Source: PubMed Central journal article supplement (PMC4788179)
Supplement: prid887786.ww1_default.pdf [file prid887786.ww1_default.pdf]

**Web appendix:** READ and OXMIS codes used to classify surgical revision of primary knee or hip replacement

| <b>READ/Oxmish Code</b> | <b>READ/Oxmish Term</b>                                      |
|-------------------------|--------------------------------------------------------------|
| 7K22200                 | Revision of total prosthetic replacement of hip joint NEC    |
| 7K20200                 | Revision cemented total hip replacement                      |
| K810 AC                 | REVISION HIP REPLACEMENT                                     |
| K811 A                  | REVISION ARTHROPLASTY OF HIP                                 |
| 7K21200                 | Revision uncemented total hip replacement                    |
| 7K23200                 | Revision cemented hemiarthroplasty of hip                    |
| 7K22300                 | Attention to total hip replacement NEC                       |
| 7K20x11                 | Removal prev cemented total prosthetic replacement hip joint |
| 7K24200                 | Revision uncemented hemiarthroplasty of hip                  |
| 7K20100                 | Conversion to cemented total hip replacement                 |
| 7K22100                 | Conversion to total prosthetic replacement of hip joint NEC  |
| 7K20500                 | Revision of hybrid total hip replacement NEC                 |
| 7K22x00                 | Conversion from prev total pros replace hip joint NEC        |
| 7K21100                 | Conversion to uncemented total hip replacement               |
| 7K20x00                 | Conversion from cemented total hip replacement               |
| 7K22211                 | Revision of hybrid total hip replacement NEC                 |
| 7K20400                 | Conversion to hybrid total hip replacement NEC               |
| 7K20600                 | Conver from hybrid total prosth hip joint replace NEC        |
| 7K21x00                 | Conversion from uncemented total hip replacement             |
| 7K22112                 | Conversion to hybrid total hip replacement NEC               |
| 7K22x12                 | Conver from hybrid total prosth hip joint replace NEC        |
| 7K69100                 | Revision of resurfacing arthroplasty                         |
| 7K68300                 | Conversion to excision arthroplasty                          |
| 7K6B500                 | Conversion to intraarticular arthrodesis                     |
| 7K32200                 | Revision of total knee replacement NEC                       |

|         |                                                              |
|---------|--------------------------------------------------------------|
| 7K30200 | Revision cemented total knee replacement                     |
| K812 A  | REVISION ARTHROPLASTY OF KNEE                                |
| 7K31200 | Revision uncemented total knee replacement                   |
| 7K32400 | Attention to total knee replacement NEC                      |
| 7K32x11 | Removal previous total prosthetic replacement knee joint NEC |
| 7K30x11 | Removal previous cemented total prosthetic replacement knee  |
| 7k32200 | Revision of total knee replacement NEC                       |
| 7K32100 | Conversion to total knee replacement NEC                     |
| 7K32211 | Revision hybrid total knee replacement NEC                   |
| 7K32x00 | Conversion from total knee replacement NEC                   |
| 7K37200 | Revision cemented unicompartmental knee replacement          |
| 7K39200 | Revision hybrid unicompartmental knee replacement            |
| 7K30100 | Conversion to cemented total knee replacement                |
| 7K32411 | Attention to hybrid total knee replacement NEC               |
| 7K38200 | Revision uncemented unicompartmental knee replacement        |
| 7K37100 | Conversion to cemented unicompartmental knee replacement     |
| 7K32x12 | Conversion from hybrid total knee replacement NEC            |
| 7K31x00 | Conversion from uncemented total knee replacement            |
| 7K31x11 | Removal previous uncemented total prosthet replacement knee  |
| 7K37x00 | Conversion from cemented unicompartmental knee replacement   |
| 7K39100 | Conversion to hybrid unicompartmental knee replacement       |
| 7K39x00 | Conversion from hybrid unicompartmental knee replacement     |
| 7K30x00 | Conversion from cemented total knee replacement              |
| 7K31100 | Conversion to uncemented total knee replacement              |
| 7K32112 | Conversion to hybrid total knee replacement NEC              |
| 7K38100 | Conversion to uncemented unicompartmental knee replacement   |
| 7K38x00 | Conversion from uncemented unicompartmental knee replacement |
| 7K69100 | Revision of resurfacing arthroplasty                         |

7K68300

Conversion to excision arthroplasty

7K6B500

Conversion to intraarticular arthrodesis
